# Supplementary material
Source: MDPI journal article supplement (https://www.mdpi.com/2072-4292/7/11/15388)
Supplement: s1 [file s1]

Supplementary Information

S1. Test Sites Description

The Spanish, Irish and Finnish areas under investigation are represented in Figure S1, where the analysed ECV cells are highlighted and labeled with the name of the *in situ* stations considered for this study (in Ireland and Finland), or with the reference names used in the paper (for the ECV size pixels including the REMEDHUS *in situ* stations in Spain).


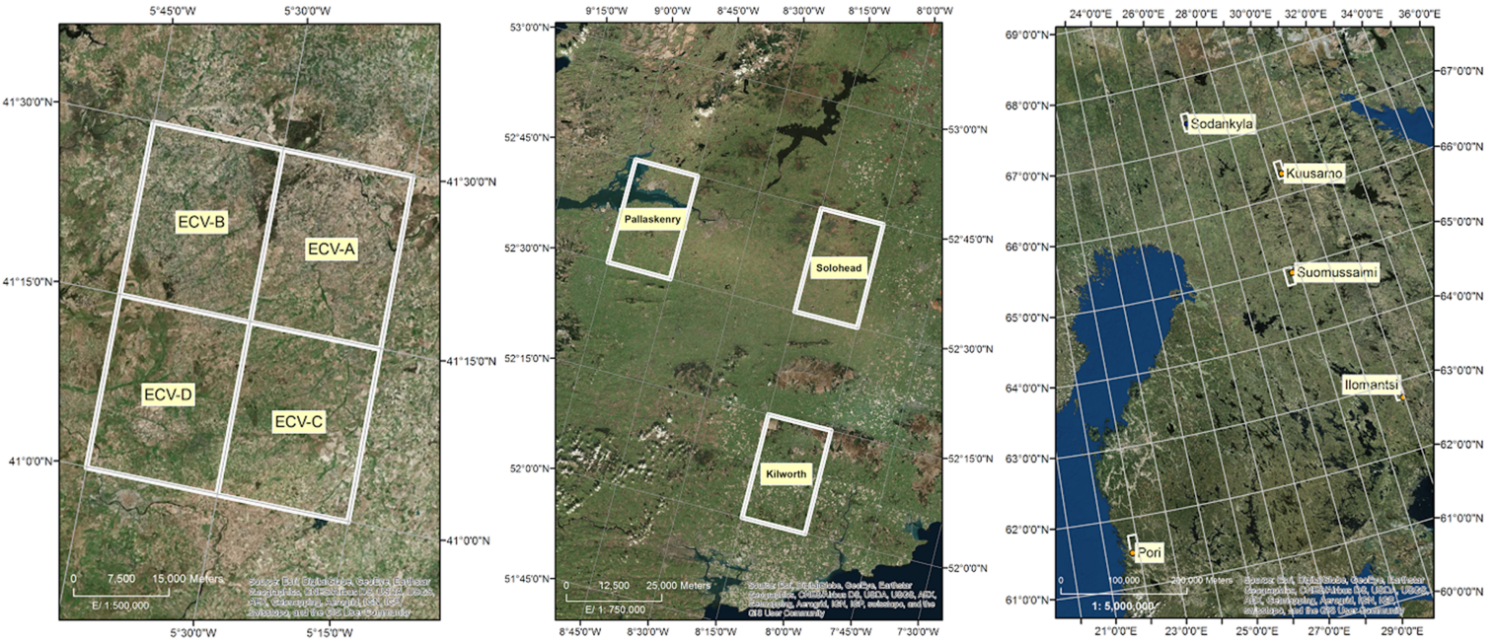


**Figure S1.** Areas and sites under investigation in Spain (REMEDHUS soil moisture network), Ireland (soil moisture network from AEON project) and Finland (FMI and GTK soil moisture network).

S2. Material

S2.1. Remedhus Network


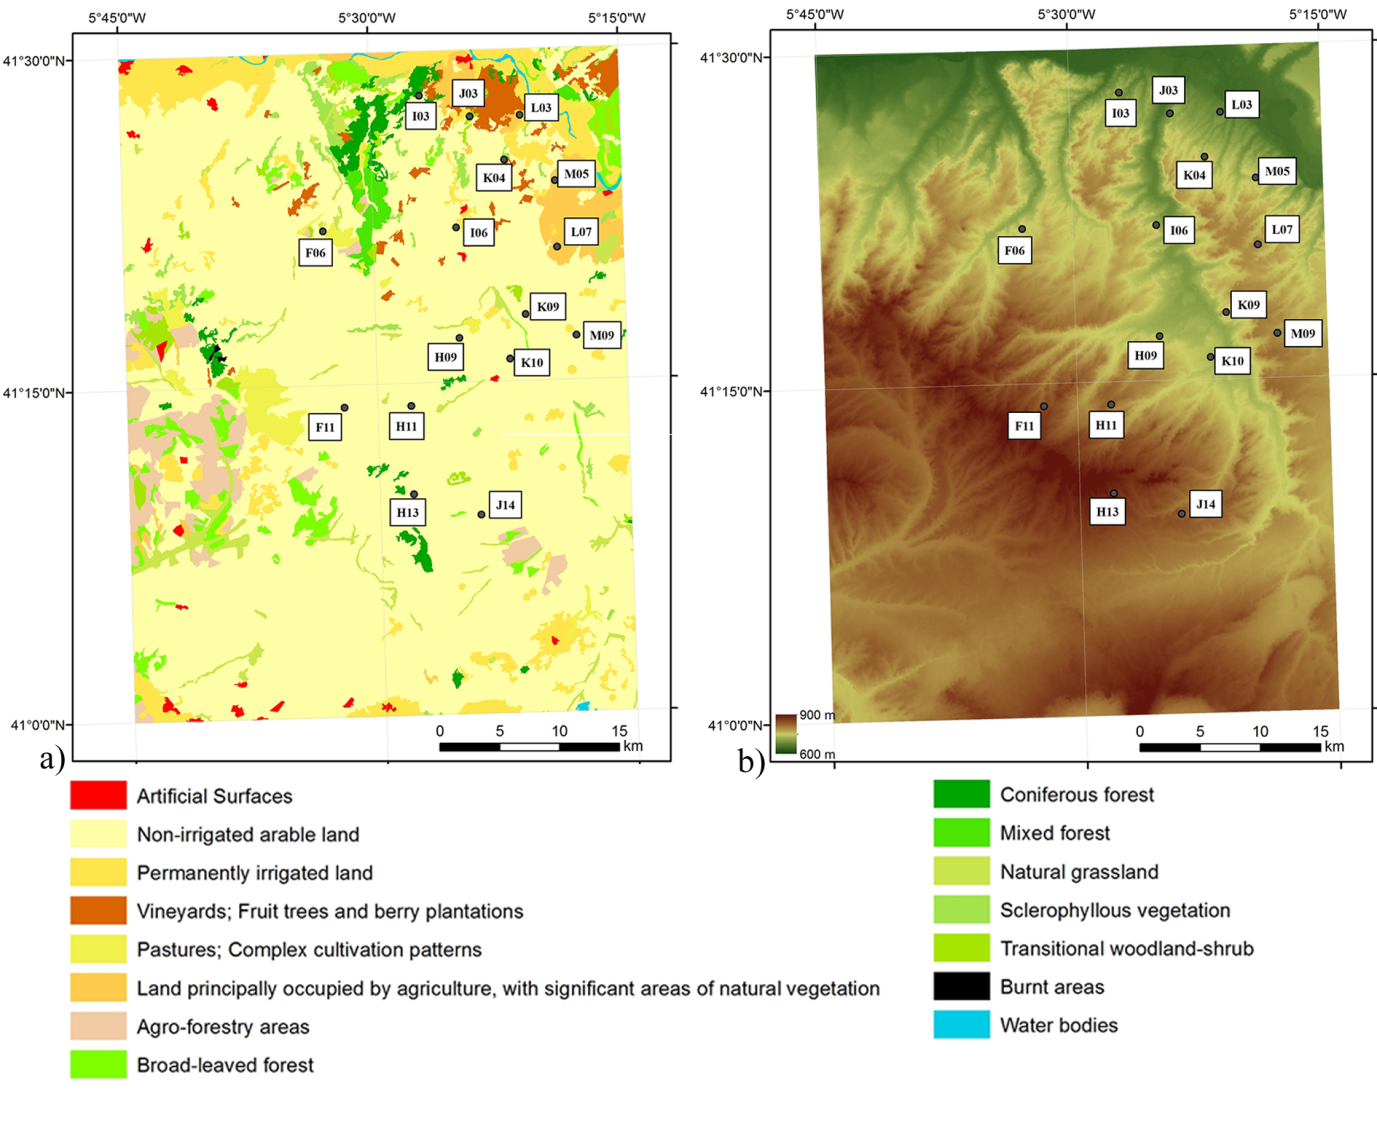


**Figure S2.** (**a**) Corine Land Cover map (CLC 2006) of the Spanish area under study;
(**b**) Digital elevation Model (DEM) of the Spanish ECV cells. Topographic complexity: ECV-A = 3%; ECV-B = 4%; ECV-C = 2%; ECV-D = 1%. The analyzed REMEDHUS
*in situ* stations are represented by the red dots which are labeled with the correspondent name.

S2.2. IRISH Network


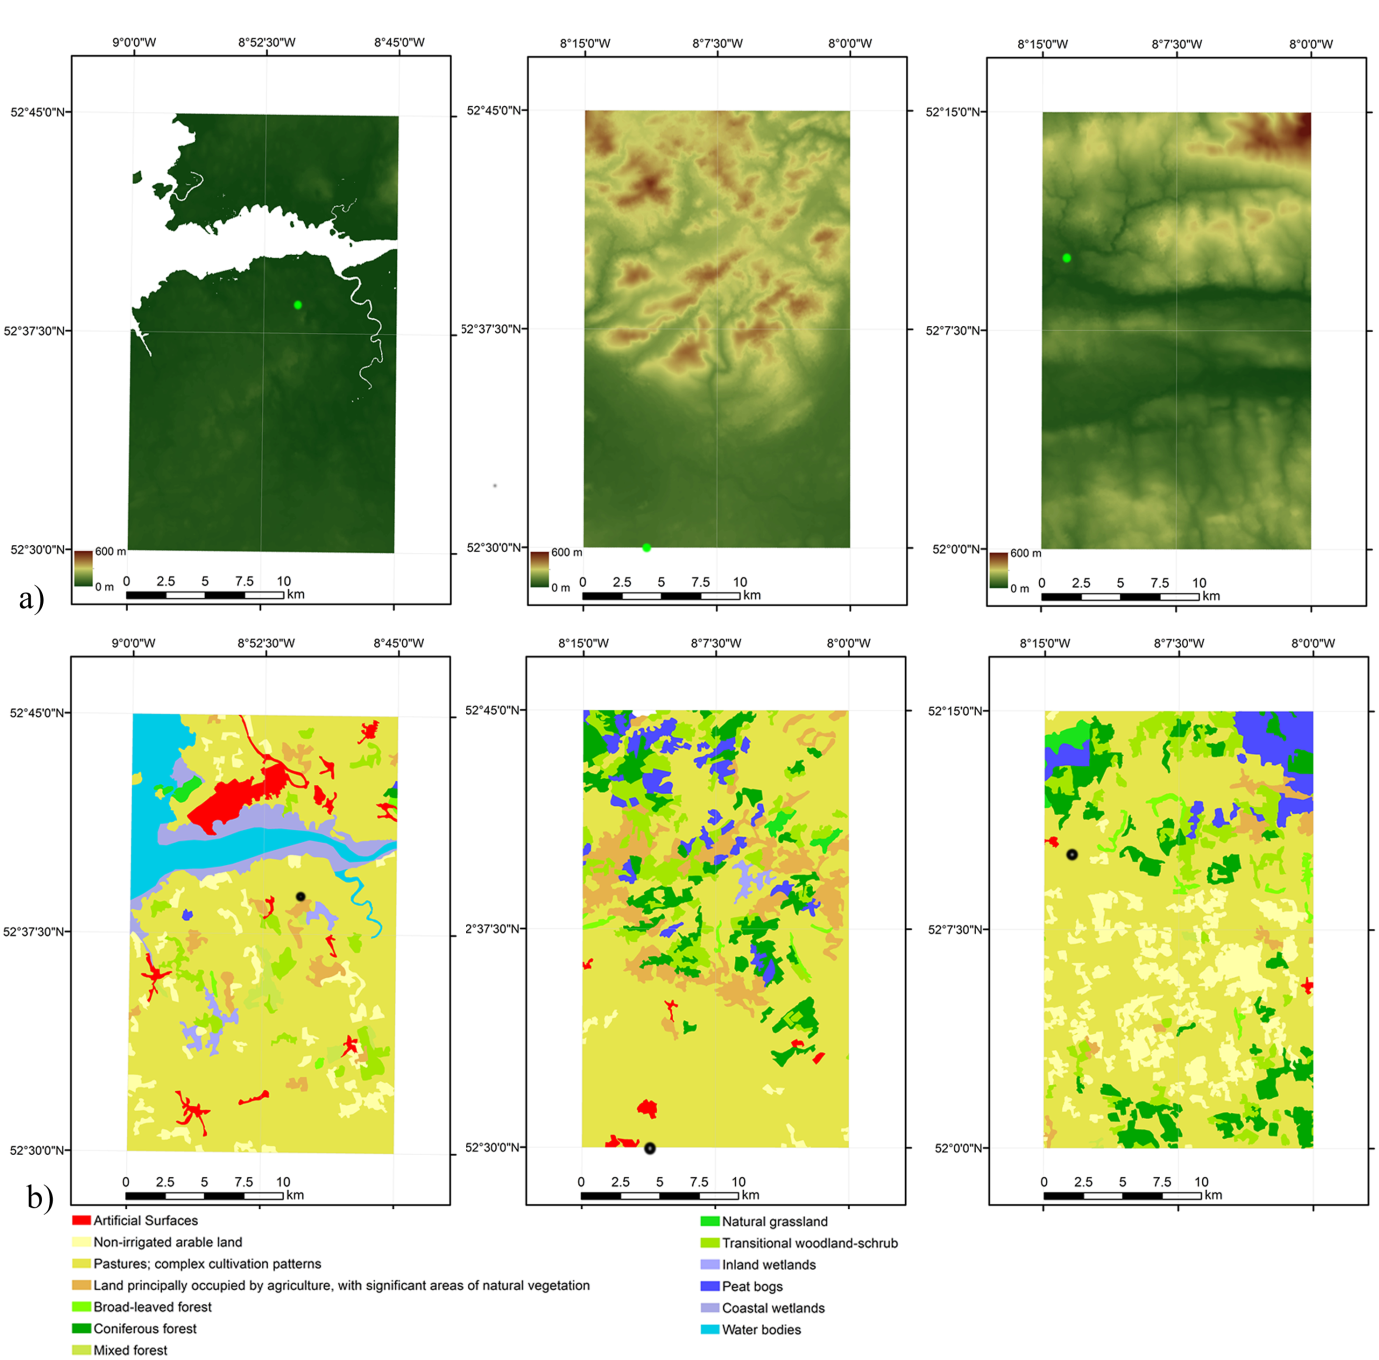


**Figure S3.** Three analysed Irish ECV size pixels including one *in situ* station each, represented by the green circles (from left to right: Pallaskenry, Solohead and Kilworth). (**a**) Digital Elevation Model (DEM). Topographic complexity: Pallaskenry = 1%; Solohead = 5%; Kilworth = 1%; (**b**) Corine Land Cover maps (CLC 2006).

S2.3. FMI Network


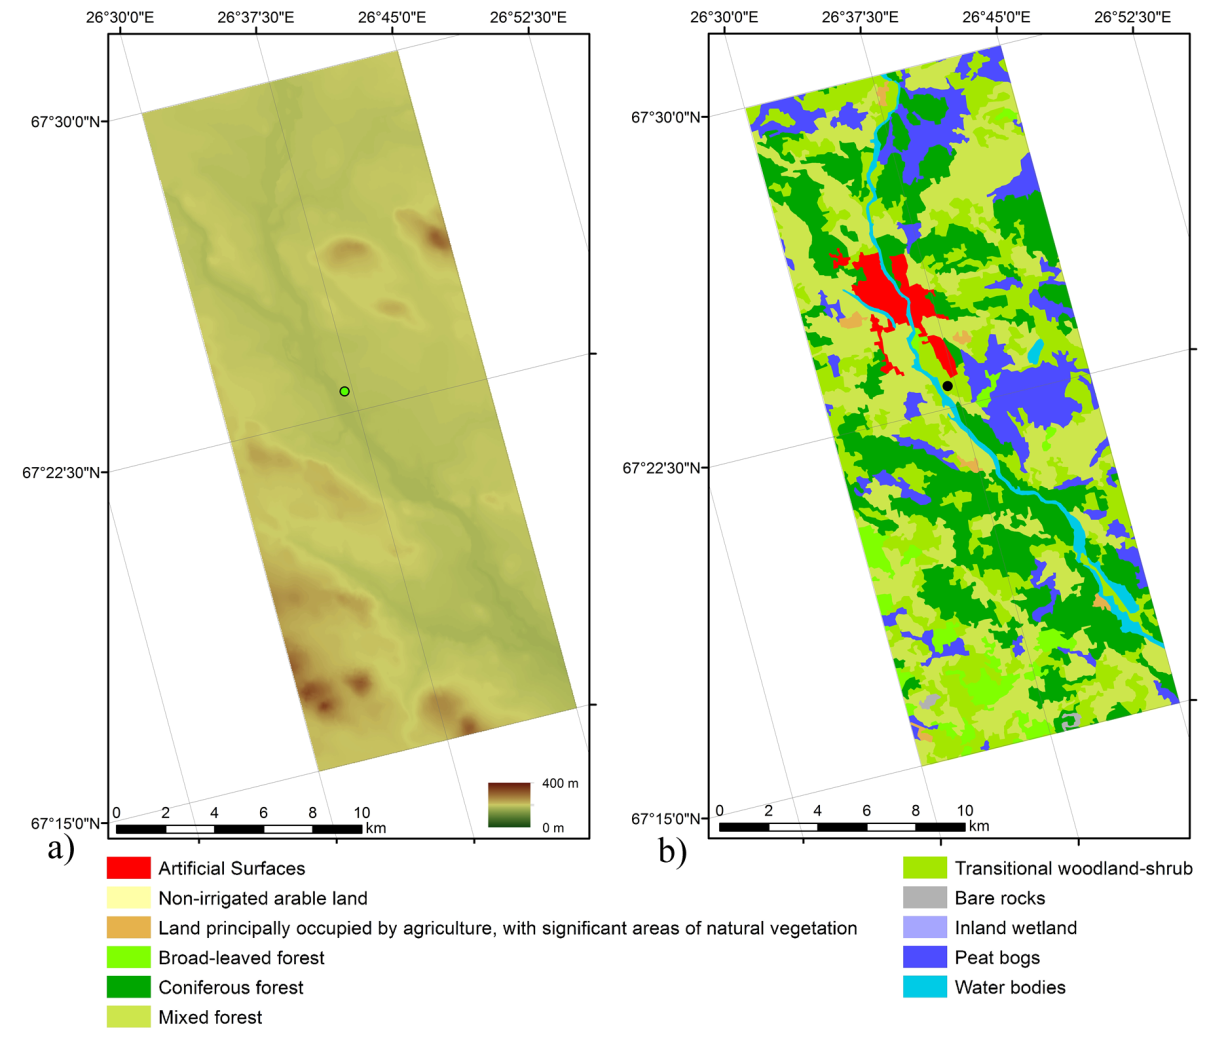


**Figure S4.** ECV size pixel including the *in situ* station of Sodankylä (FMI network).
(**a**) Digital Elevation Model (DEM). Topographic complexity: 1%; (**b**) Corine Land Cover (CLC 2006).

S2.4. GTK Network


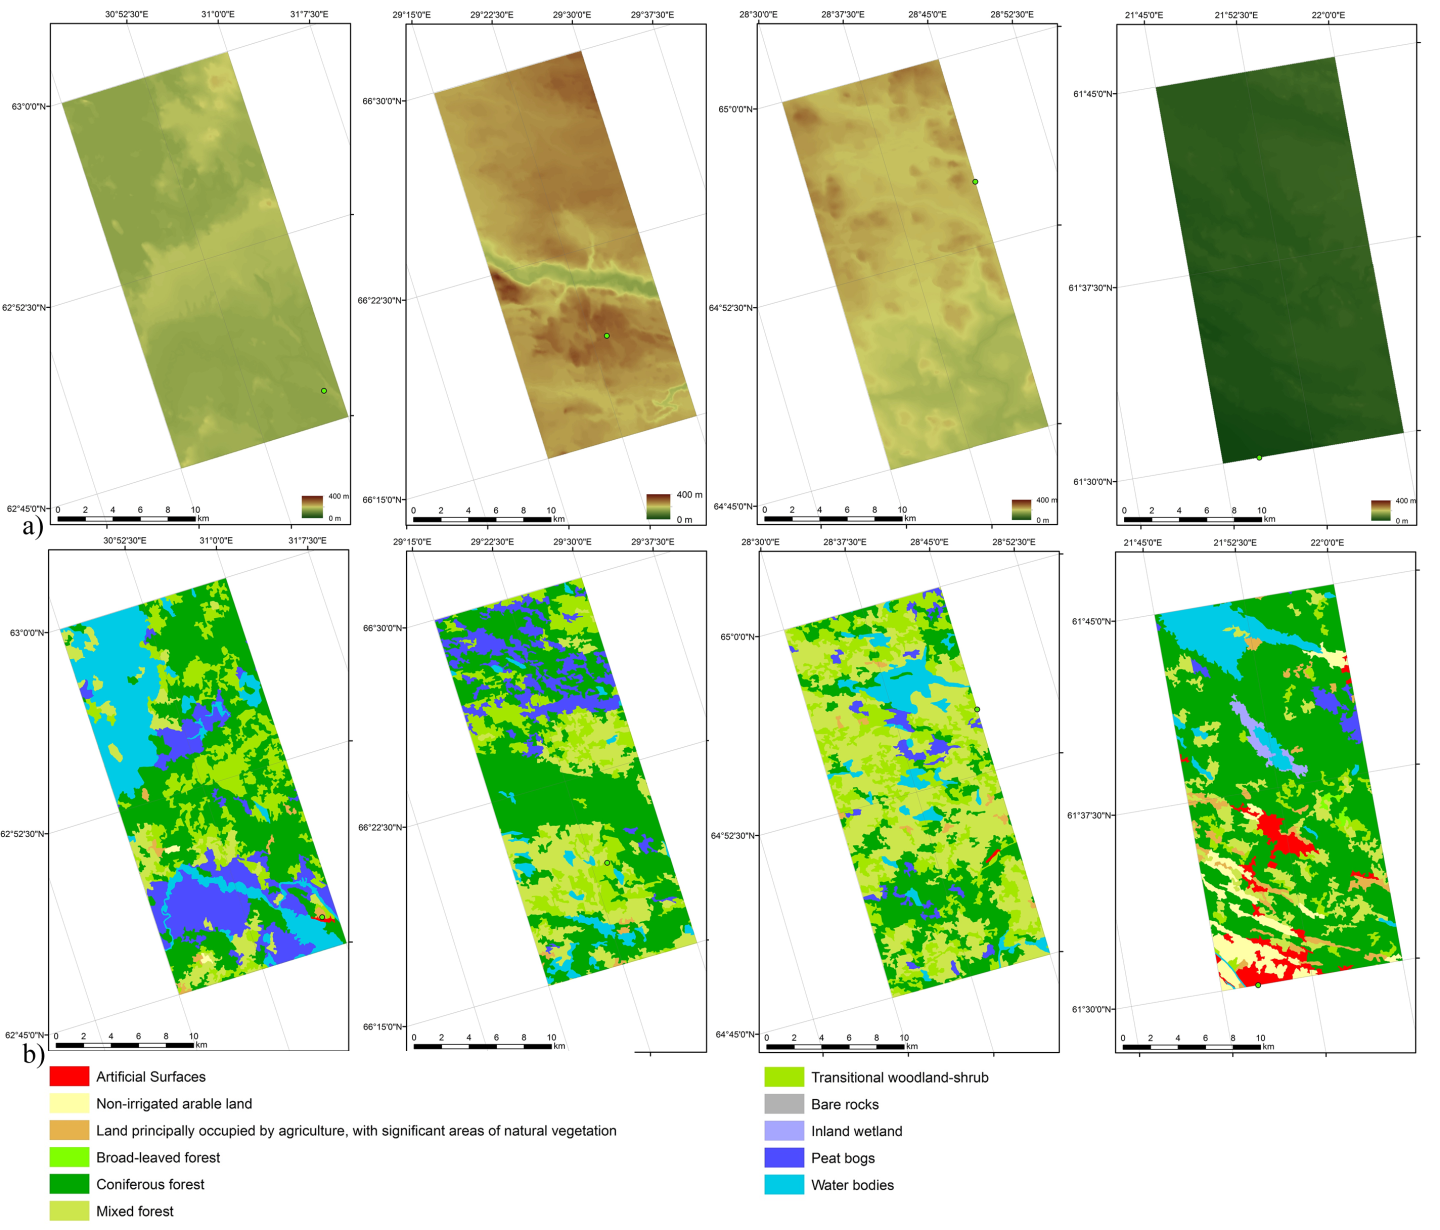


**Figure S5.** ECV size pixels including one Finnish GTK in situ station each (from left
to right: Ilomantsi, Kuusamo, Suomussalmi, Pori). (**a**) Digital Elevation Model (DEM). Topographic complexity: Ilomantsi = 1%; Kuusamo = 1%; Suomussalmi = 1%; Pori = 0%; (**b**) Corine Land Cover (CLC 2006).

S3. Methods

S3.1.CDF Matching Technique

Since the three time series are provided in different dynamic ranges, the data have been firstly scaled into a common climatology. A typical method based on the Cumulative Distribution Function (CDF) matching has been applied. Through this technique, the satellite data are rescaled so that both ASAR CDF and ECV CDF match the CDF of the *in situ* SM dataset. Firstly, each dataset is ranked according to the soil moisture values; then, differences between ranked *in situ* soil moisture values and either ASAR or ECV datasets are evaluated. Finally, a polynomial fitting function is used to generate the unbiased satellite soil moisture time series.

The plots in Figure S6 represent an example of such technique applied to the soil moisture time series collected over the ECV-B cell in Spain.


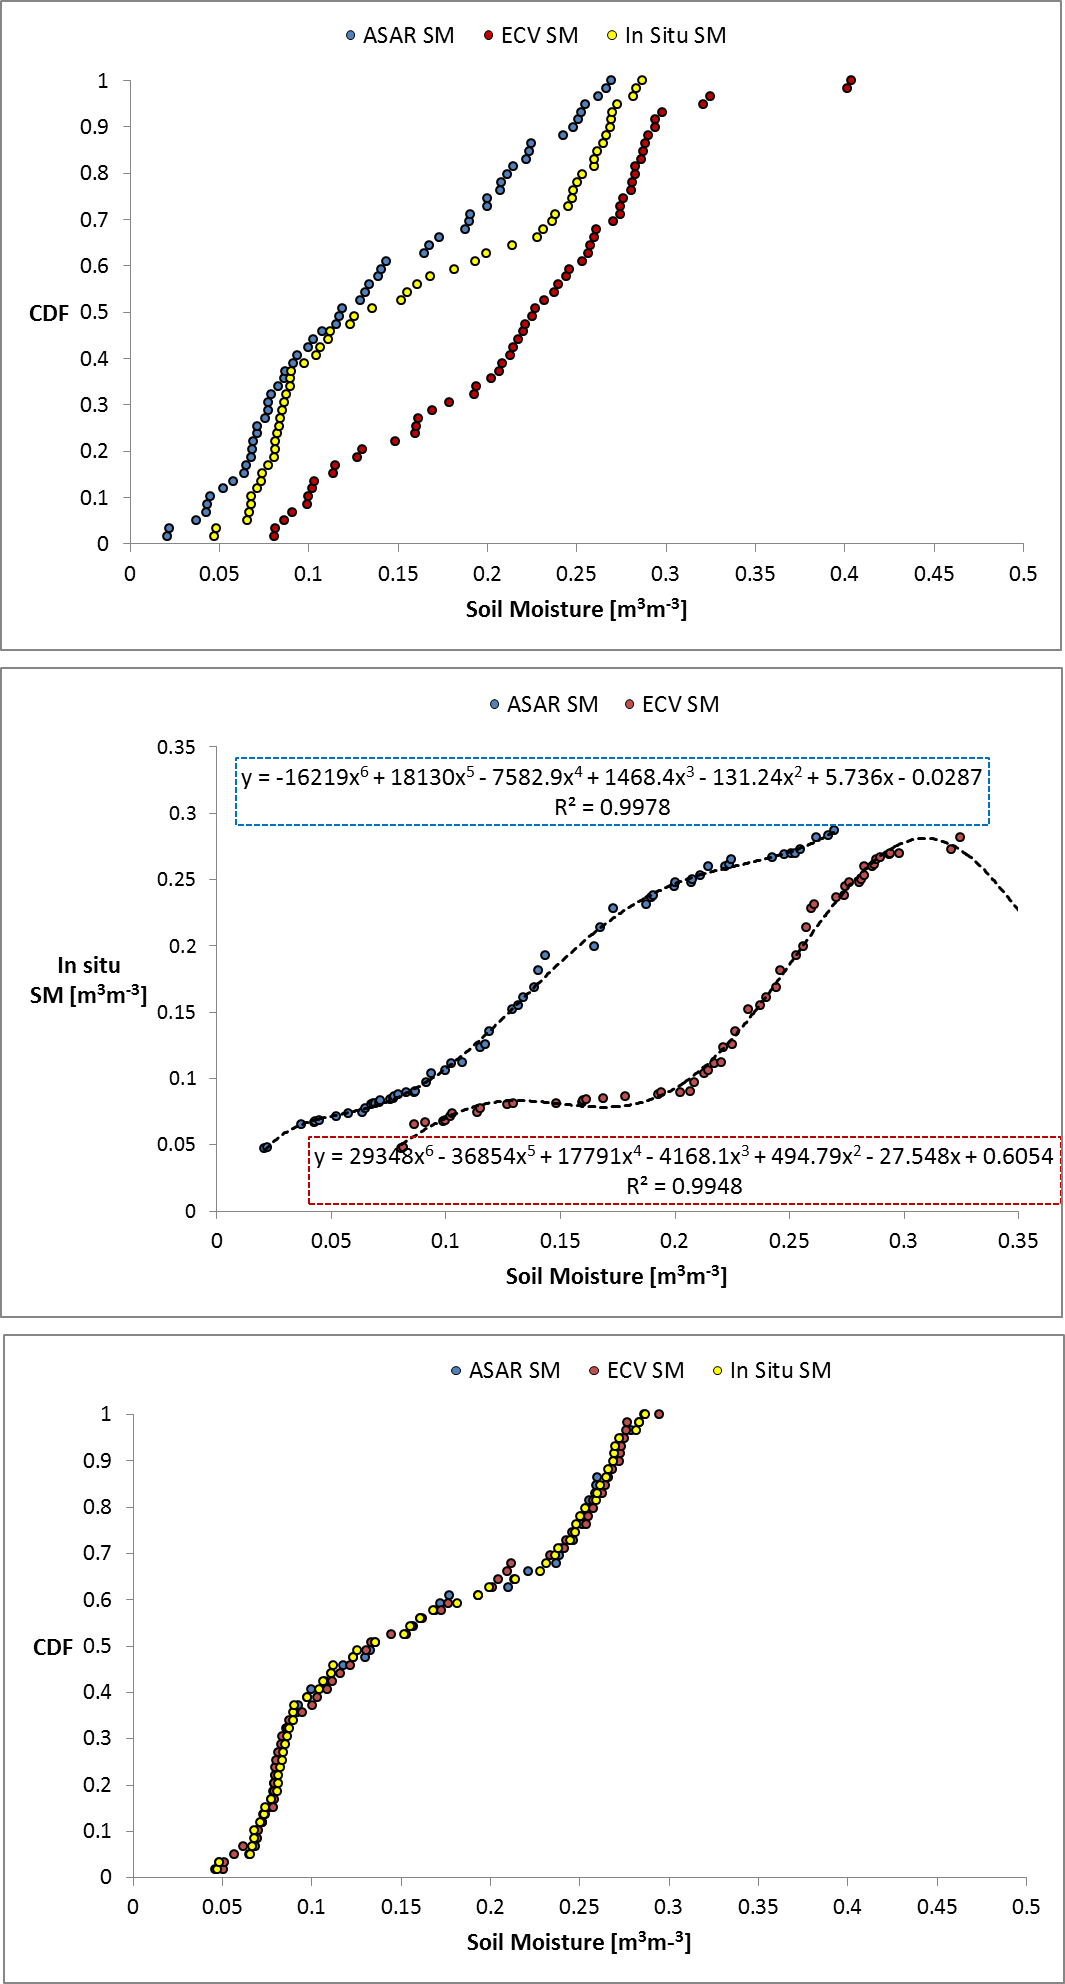


**Figure S6.** (**Top**) CDFs computed for ASAR, ECV and *in situ* soil moisture dataset in the ECV-B cell in Spain. (**Middle**) Polynomial scaling functions of ASAR and ECV SM datasets. (**Bottom**) ASAR and ECV SM CDFs after rescaling by using the CDF of the
*in situ* SM dataset as reference.

S3.2. Regional Scale Analysis of SM Temporal Variability


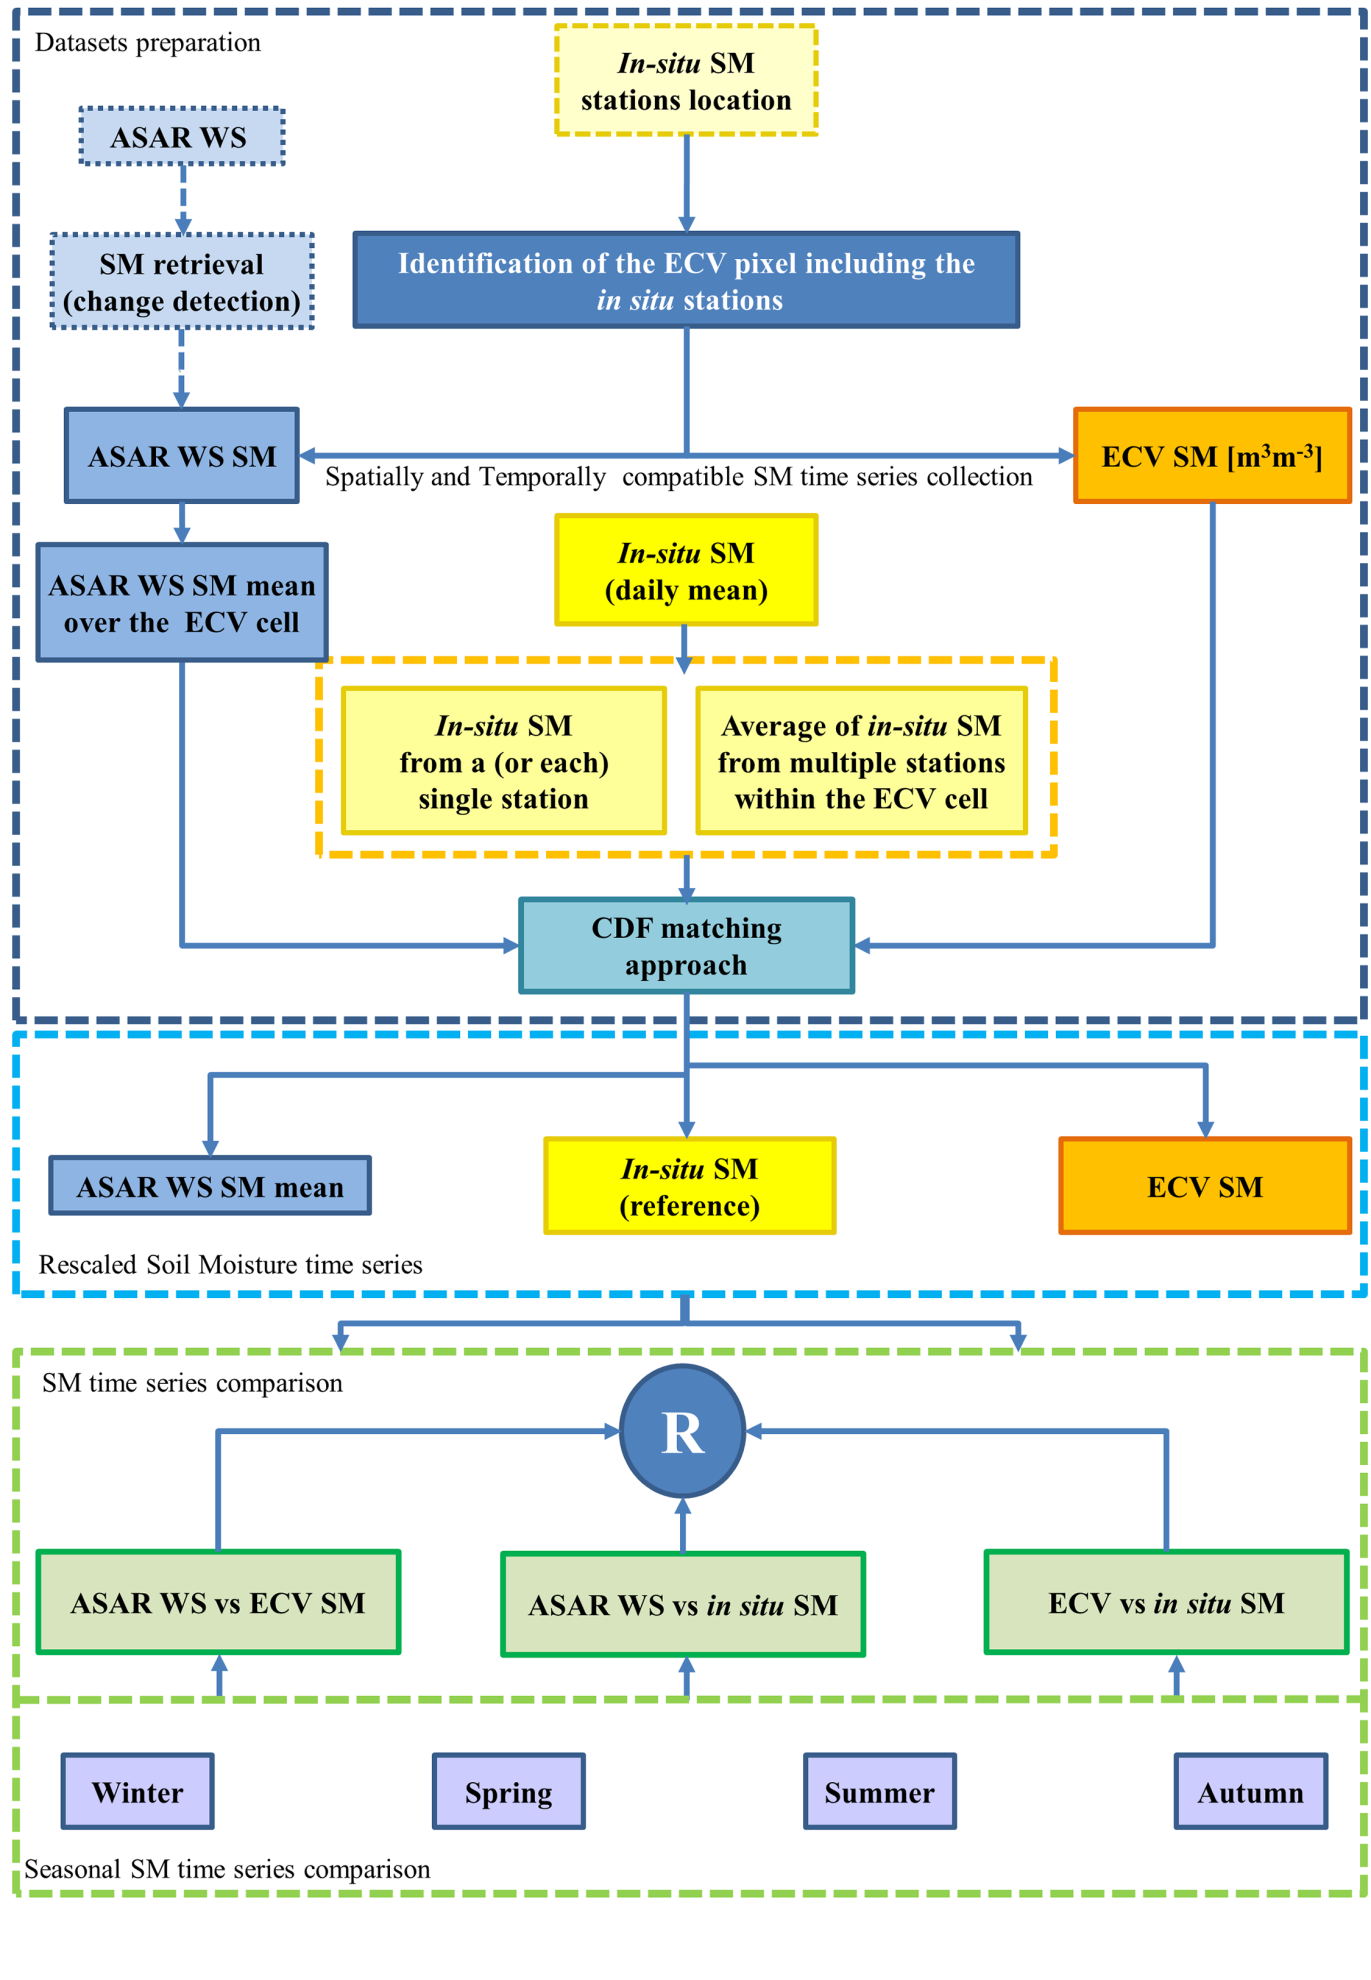


**Figure S7.** Flow chart describing the methodology used to carry out the regional scale analysis of SM temporal variability by comparing the ASAR WS, ECV and *in situ*SM datasets.

S3.3. Analysis of SM Spatial Variability


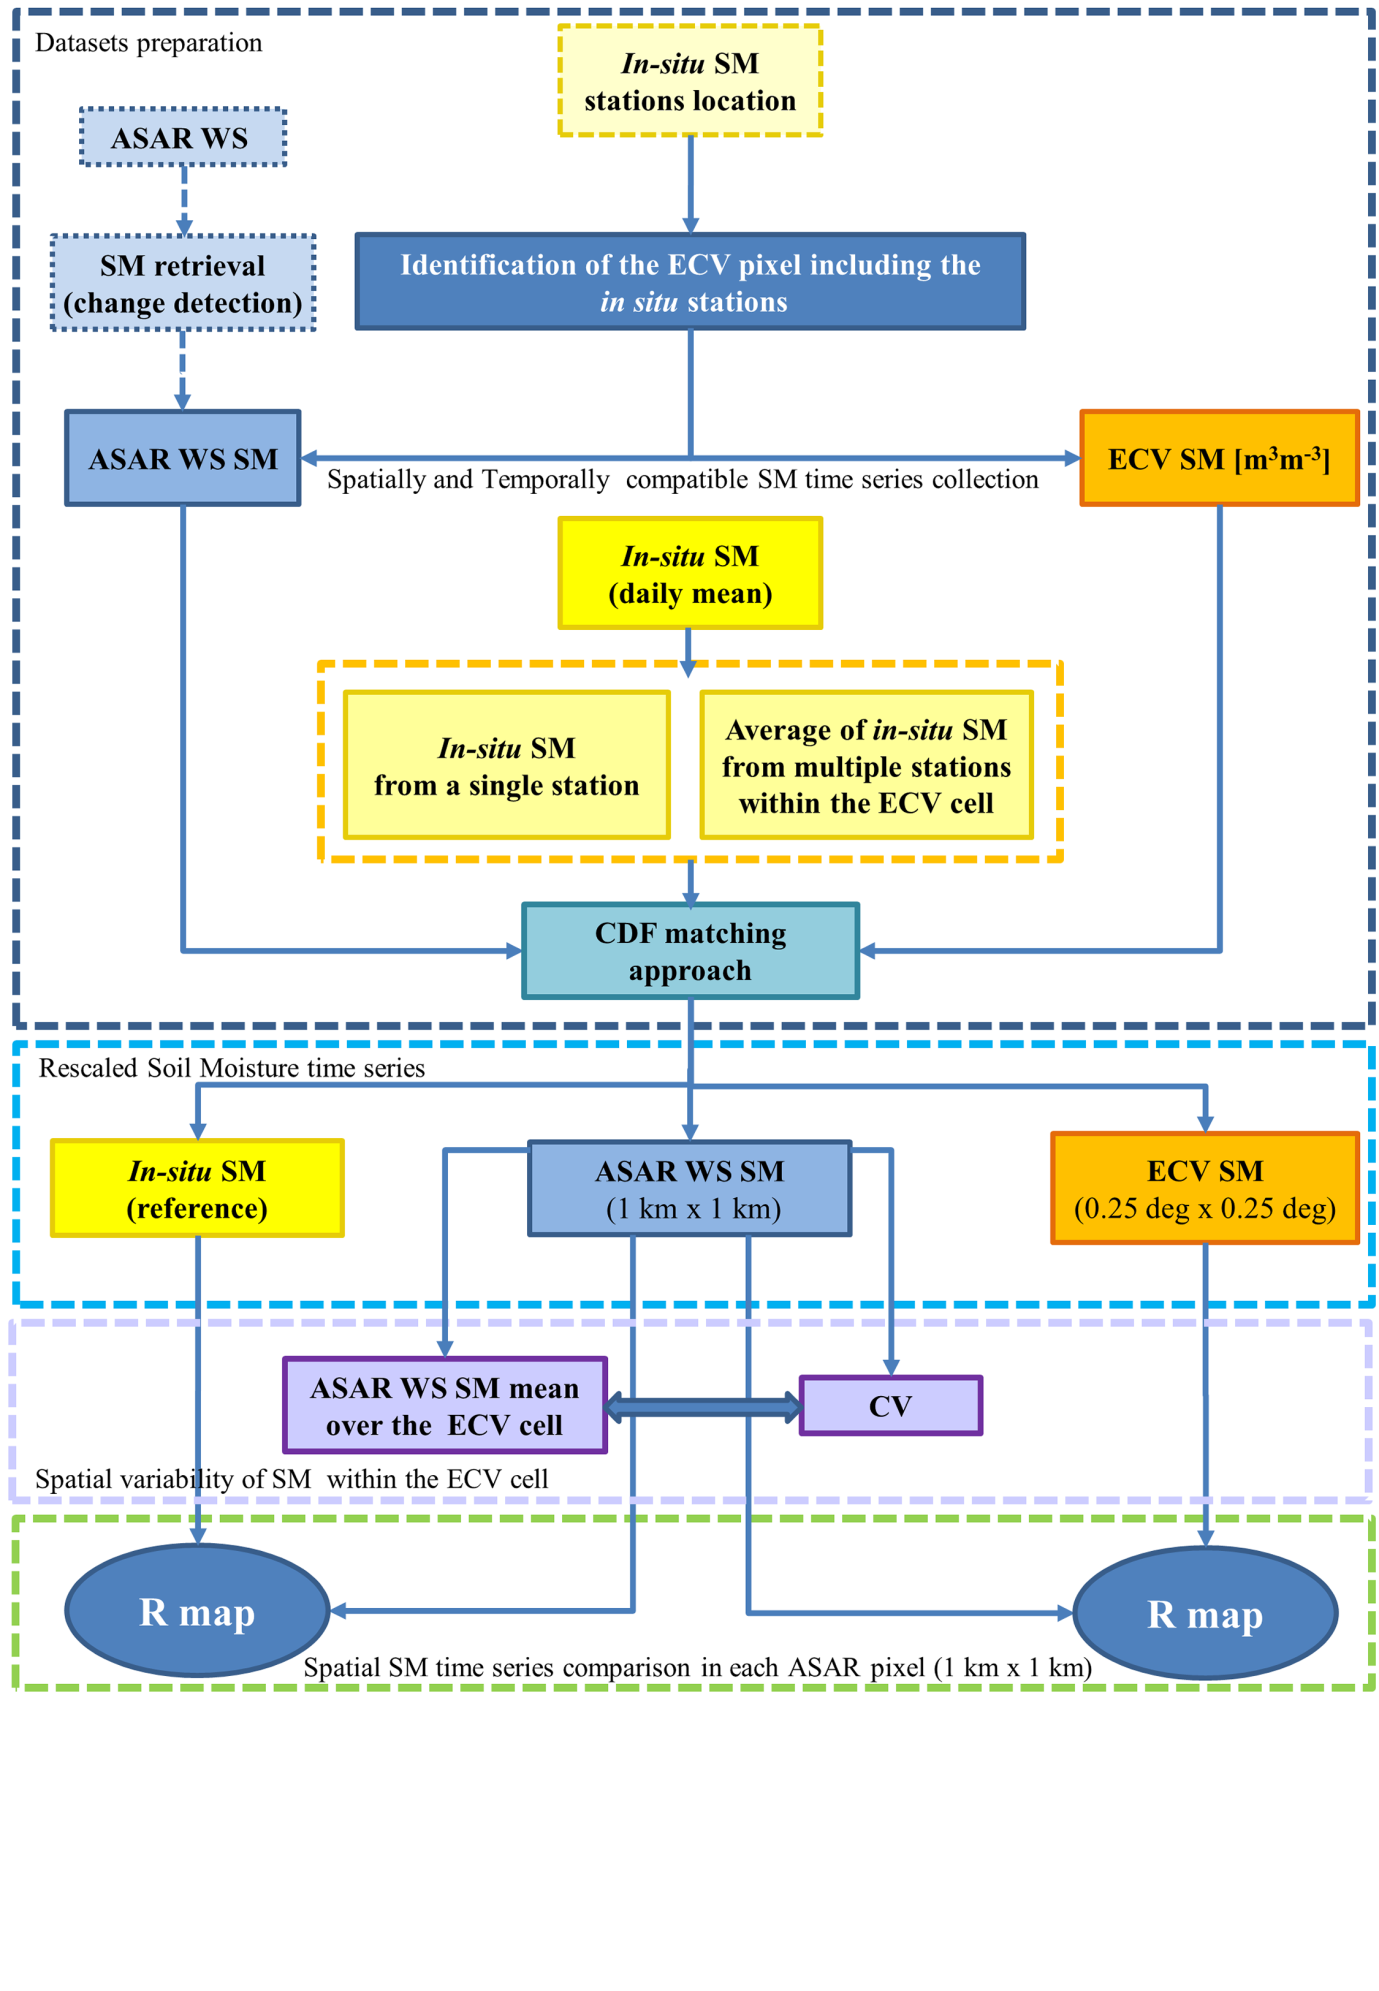


**Figure S8.** Flow chart describing the methodology used to carry out the analysis of SM temporal variability by comparing ASAR WS and ECV SM datasets, as well as ASAR WS and *in situ* SM datasets in each ASAR pixel (1 km × 1 km after resampling) within each ECV cell.

For detailed information about the adopted approaches please refer to the manuscript.

S4. Results

S4.1. Soil Moisture Temporal Variability

S4.1.1. Spain- SM Anomalies

The anomalies of SM have been evaluated for each dataset and in each ECV cell, by subtracting the average of soil moisture value estimated over the whole period of observation from each SM value. The trend of anomalies displayed in Figure S9 reflects well the typical seasonal cycle characterising the Duero Basin, with wet winters and dry summers. However, in some cases the behaviour of the SM anomalies for each of the three time series exhibit opposing trends.


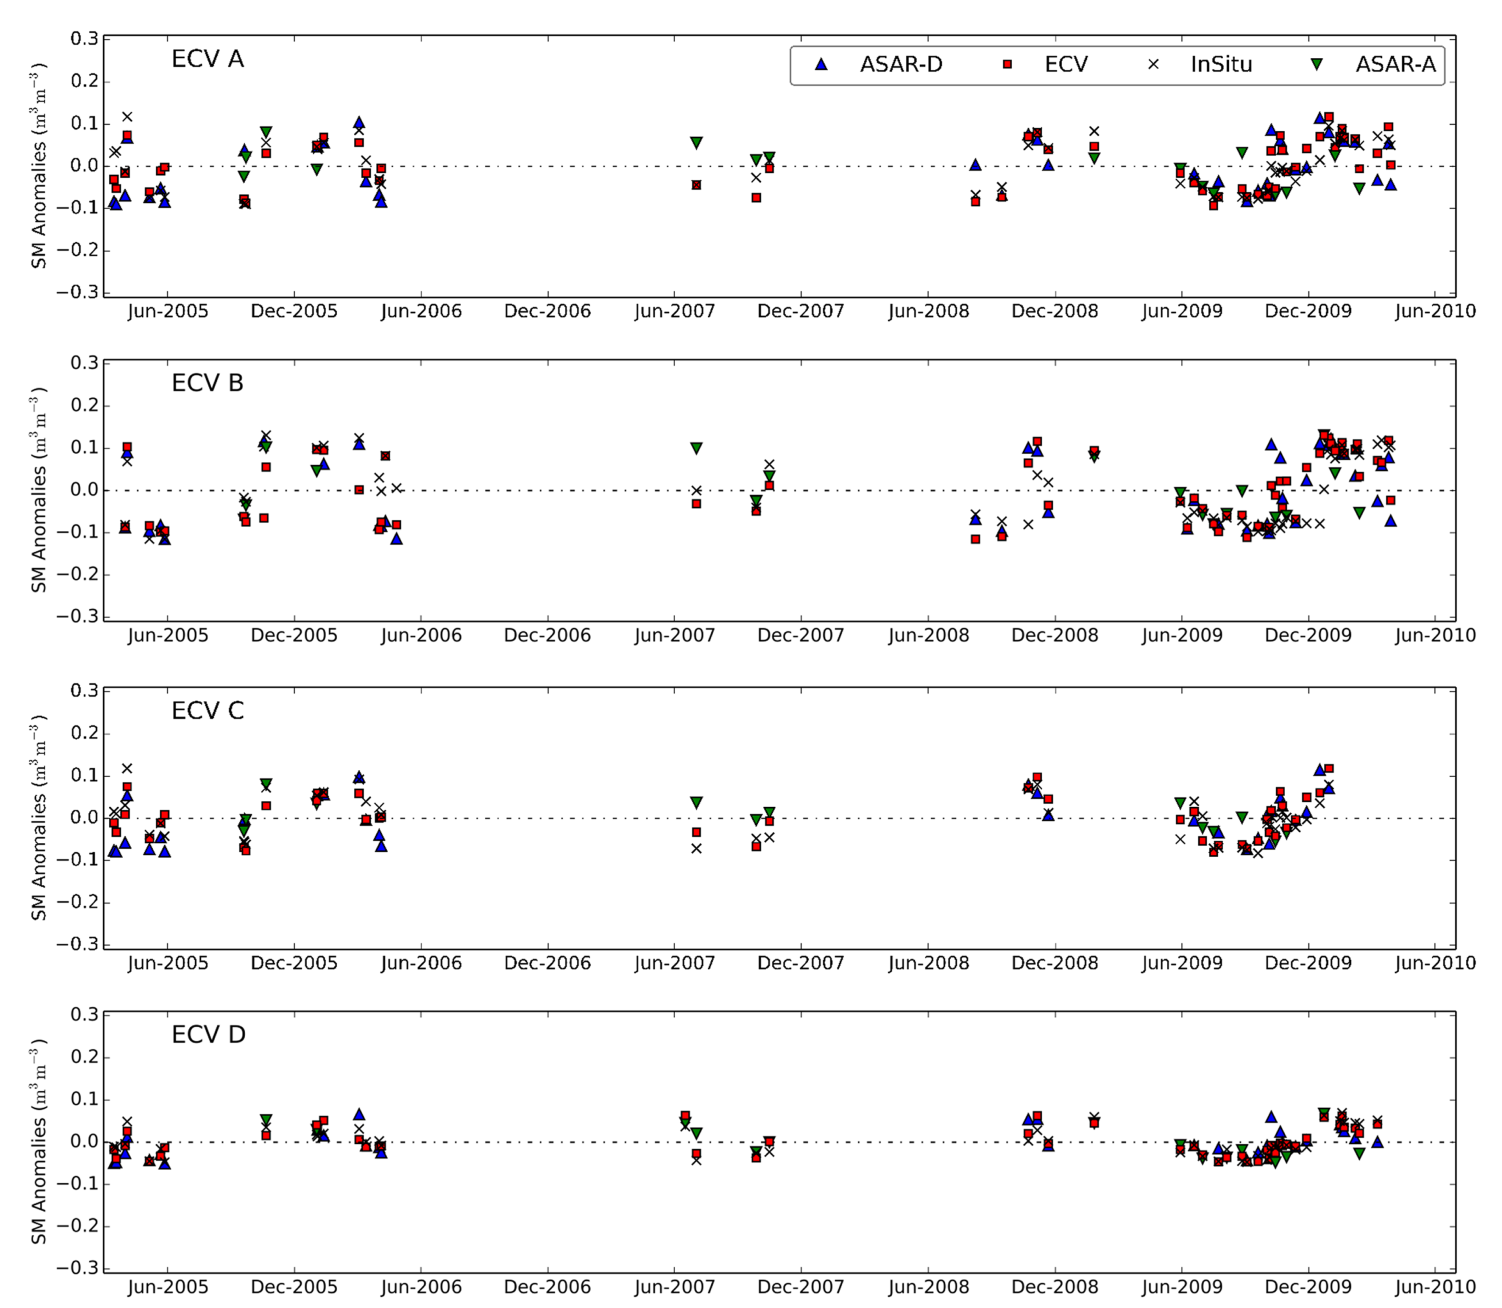


**Figure S9.** Temporal evolution of ASAR, ECV and in situ SM anomalies estimated in the 2005–2010 time interval in each Spanish ECV cell.

In the ECV-A cell, both the ASAR and ECV SM datasets reveal, in some winter and spring days, drier soil conditions (negative anomalies), whereas the *in situ* observations detect wetter soil status (positive anomalies). The lower SM values occurring in summer are well represented by the negative ECV product anomalies, which agree well with the values calculated for the *in situ* time series. On the contrary, some summer ASAR acquisitions (e.g., 3 July 2007, 27 August 2009) provided quite high SM values, and therefore higher SM anomalies (positive values), which do not reflect the soil moisture behaviour highlighted by the other datasets (negative anomalies).

Similar behaviour of soil moisture anomalies has been observed in the ECV-B cell. However, here winter *in situ* SM values tend to be constantly about 0.1 m3·m−3 higher than the multi-year average, while satellite SM anomalies exhibit larger variability.

Particularly good agreement can be observed in the ECV-C cell between the SM anomalies evaluated for the ECV and the *in situ* time series throughout the whole period of observation. According to the ground measurements and the ECV SM product, spring SM anomalies vary between −0.05 m3·m−3 and 0.05 m3·m−3, while larger variation can be observed for the ASAR SM anomalies, which mainly indicate drier soil conditions.

Very good agreement between all the satellites SM anomalies and the *in situ* ones can be observed in the ECV-D. Particularly similar behaviour can be noted in spring and summer between the anomalies evaluated for the ECV SM product and the ground measurements dataset.

S4.1.2. Ireland—SM Anomalies

Looking at the soil moisture anomalies evaluated with respect to the whole period of observation (Figure S10), a seasonal cycle is highlighted in each dataset. The satellite SM anomalies trends agree quite well with those referred to the *in situ* time series. However, in few cases opposite behaviours occur. For instance, in Kilworth ASAR and ECV SM negative anomalies on the 7 January 2009 do not correspond to drier soil conditions as a positive anomaly value has been evaluated by using the *in situ* SM dataset which is considered as reference. The opposite takes place on the 1 July 2009. Similarly, in Pallaskenry wetter soil conditions recorded *in situ* on the 25 April 2009 and 17 May 2009 disagree with the negative SM anomalies evaluated for the ASAR and ECV SM dataset. As well, the negative *in situ* anomalies occurring on the 18 June 2009 and 7 July 2009 correspond to wetter soil conditions according to the positive values calculated for the satellite observations. In Solohead, despite the anomaly trends being quite similar for all the datasets, satellite retrieved SM values tend to be higher than the average in summer, whereas ground measurements always show dry soil conditions.


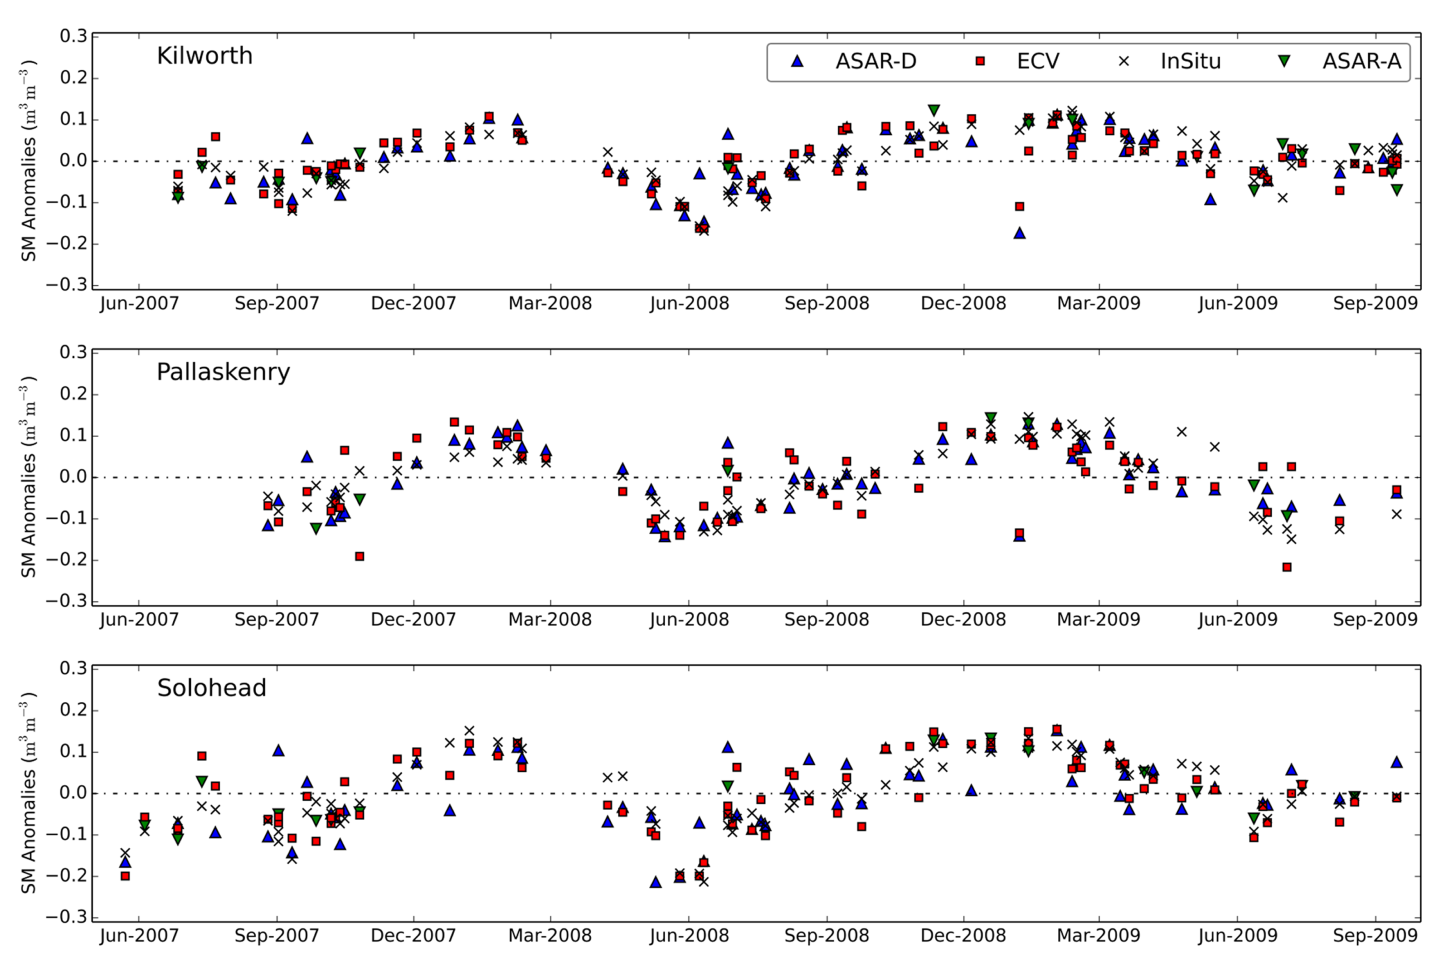


**Figure S10.** Temporal evolution of ASAR, ECV and *in situ* SM anomalies estimated in the 2007–2009 time interval in each Irish ECV cell.

S4.1.3. Soil Moisture Temporal Variability in Finland

In Table S1 we report the results achieved through the SM datasets inter-comparison at the Finnish sites. Differently from Table 7 shown in the paper, these correlation values have been evaluated by neglecting those observations taken when the soil temperature was below 0 °C. However, such an approach has not provided any better result.

**Table S1.** Correlation values evaluated between each pair of soil moisture dataset, excluding data recorded when frozen conditions of the soil occurred.

| **ISMN** | **Site** | **n** | **ASAR *vs.* ECV** | | **ASAR *vs.* *in situ*** | | **ECV *vs.* *in situ*** | |
| --- | --- | --- | --- | --- | --- | --- | --- | --- |
| **R** | ***p*** | **R** | ***p*** | **R** | ***p*** |
| FMI | Sodankylä | 111 | 0.51 | <0.001 | 0.003 | 0.49 | −0.03 | 0.38 |
| GTK | Ilomantsi | 47 | 0.33 | 0.01 | 0.03 | 0.42 | 0.14 | 0.17 |
| Kuusamo | 62 | 0.40 | <0.001 | −0.24 | 0.03 | −0.28 | 0.01 |
| Suomussalmi | 95 | 0.30 | 0.001 | −0.08 | 0.22 | 0.17 | 0.05 |
| Pori | 84 | 0.36 | <0.001 | −0.17 | 0.06 | −0.18 | 0.05 |

S4.1.4. Finland—SM Anomalies

In Figure S11 the SM anomalies evaluated for each site and dataset are shown. Wetter and drier moisture conditions recorded in autumn at Sodankylä *in situ* station agree quite well with the trend of the anomalies evaluated for both ASAR and ECV SM datasets. However, the satellite anomalies are larger than those associated with the ground measurements. In contrast, wetter spring conditions *in situ* mainly correspond to drier soil according to the anomalies evaluated by using the ASAR and the ECV time series. Differently, in summer the satellites anomalies are mainly positive (wetter soil conditions), whereas the ground measurements exhibit SM values lower than the average.


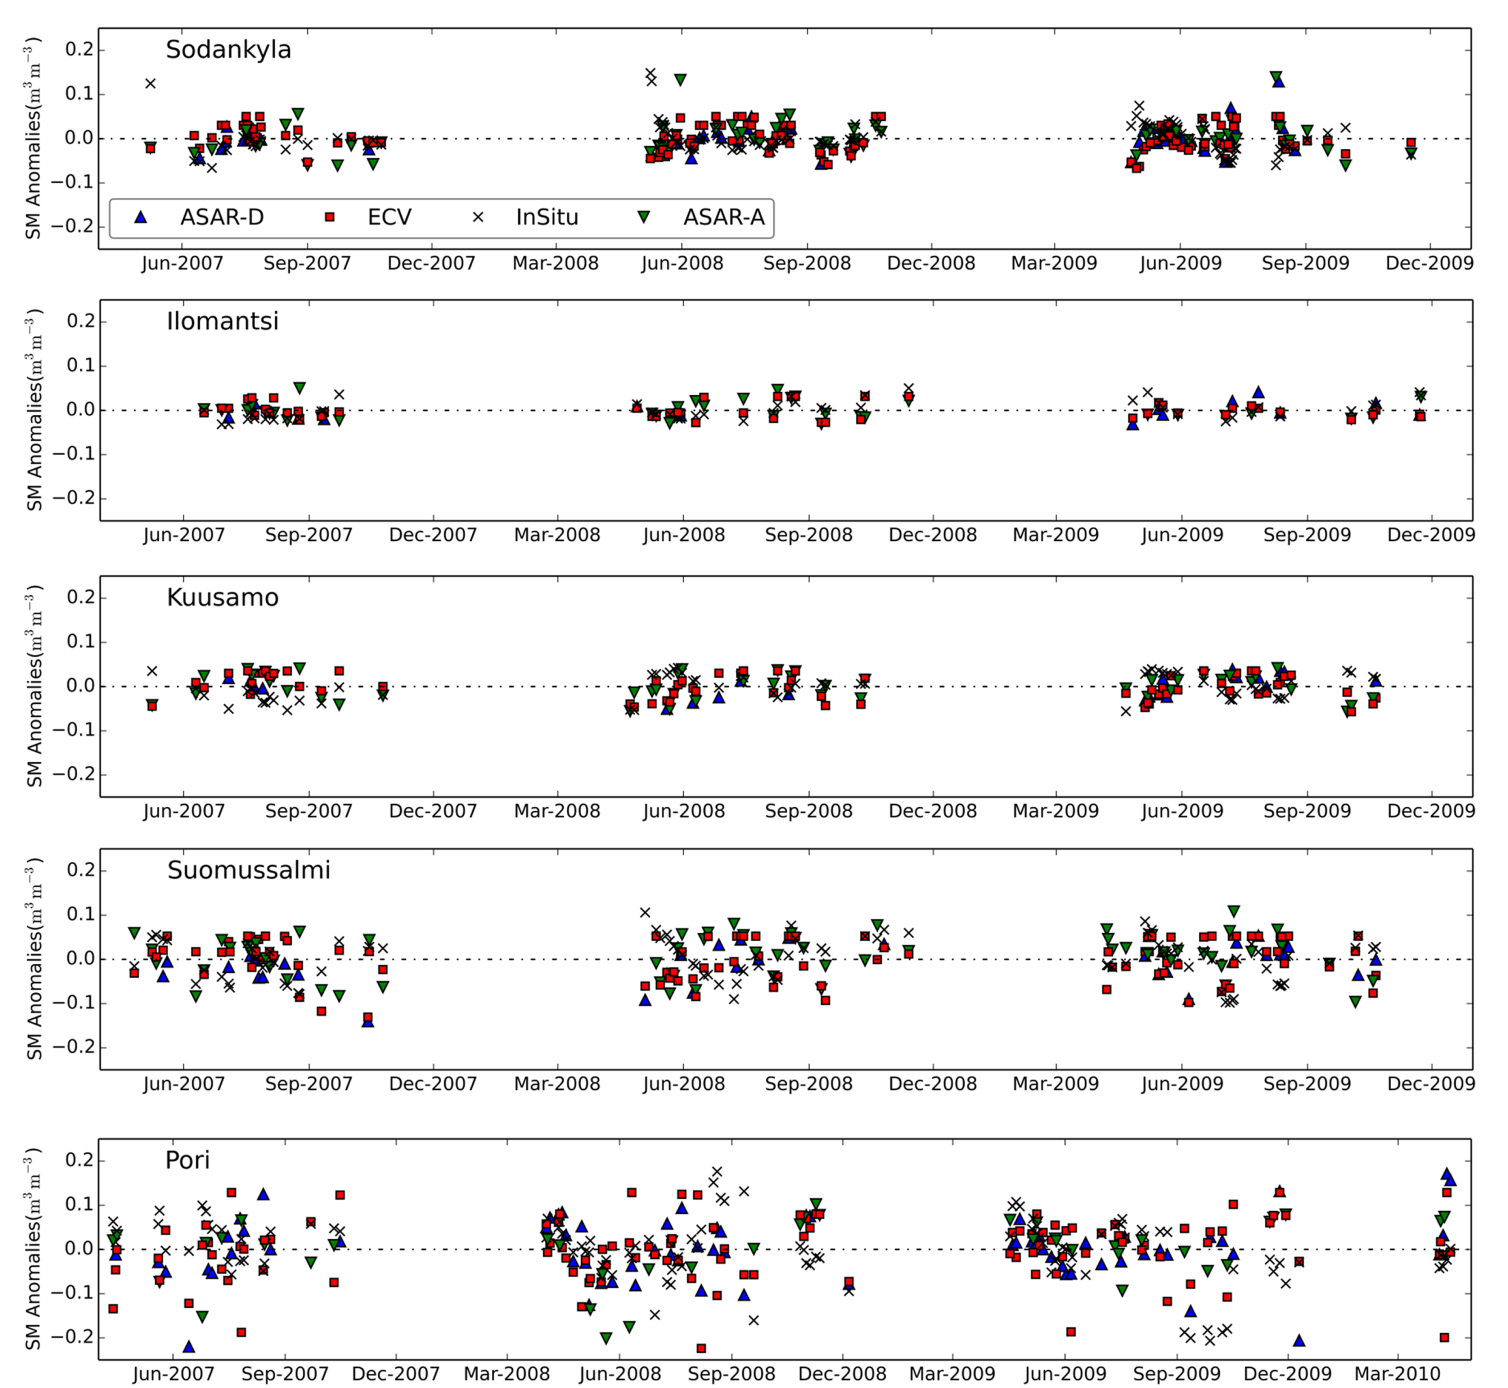


**Figure S11.** Temporal evolution of ASAR, ECV and *in situ* SM anomalies estimated in the 2007–2009 (2007–2010 in Pori) time interval in each Finnish ECV cell.

In contrast, in Kuusamo the anomalies evaluated for each dataset disagree in a few cases in all seasons. Drier spring and autumn exhibited by the satellite SM retrieved datasets correspond to wetter soil as shown by the anomalies calculated by using the *in situ* soil moisture time series. Drier summer conditions highlighted by the *in situ* SM anomalies often correspond to positive anomalies evaluated for the satellite retrieved soil moisture time series. This is especially evident in summer 2007.

The seasonal SM anomalies behaviour in Ilomantsi is quite similar to that observed in Kuusamo.
It can be noted that autumn 2007 and spring 2009 were particularly wetter than the average SM value, according to the anomalies evaluated for the *in situ* SM dataset. However, negative ASAR and ECV SM anomalies have been found in these dates.

In Suomussalmi a better agreement between the anomaly trends of each SM dataset is achieved in summer. However there are still some cases where drier or wetter conditions for one dataset do not correspond to the same drier or wetter conditions in the others. For instance, wetter autumn highlighted by the *in situ* SM anomalies generally correspond to negative ASAR and ECV SM anomalies. There is no specific trend for the spring SM anomalies evaluated for the satellite SM datasets, whereas ground measurements reveal mostly wetter soil status.

Differently from the other GTK sites, in Pori the *in situ* SM anomalies in autumn show drier conditions which do not correspond to the anomalies evaluated for the ASAR and ECV SM datasets. Spring and summer are generally wetter according to the ground SM anomalies, whereas satellite SM anomalies are negative in a few cases.

S4.2. Soil Moisture Spatial Variability in the Irish Sites


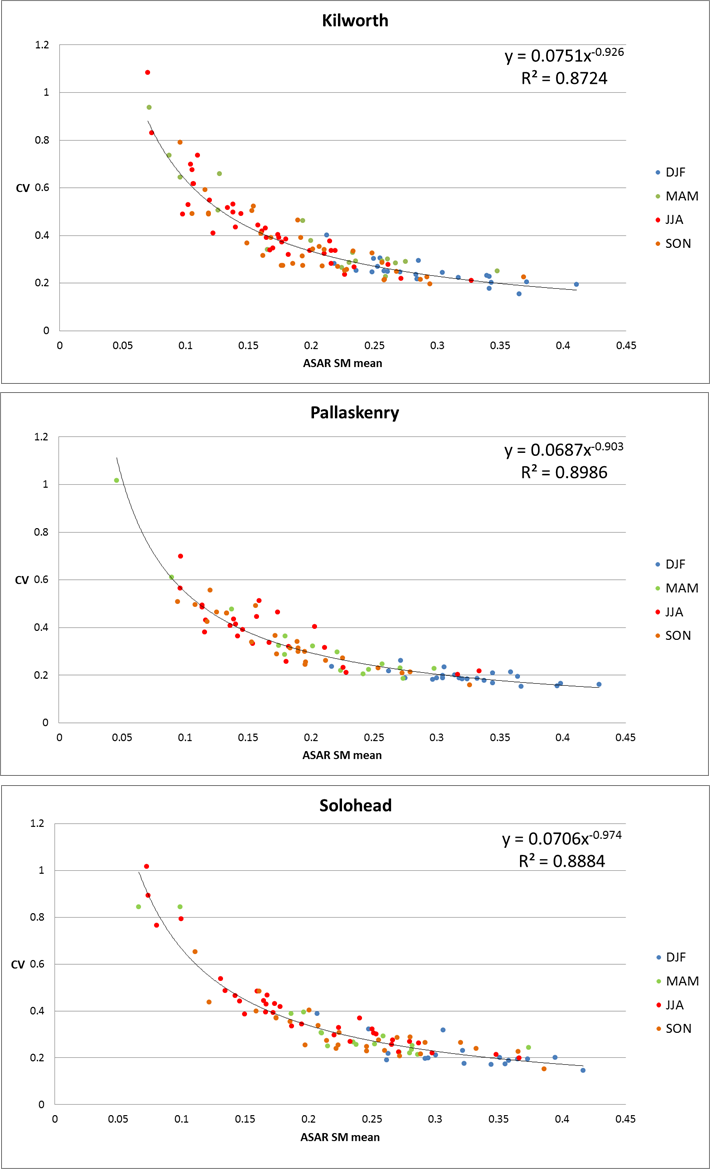


**Figure S12.** *Cont.*


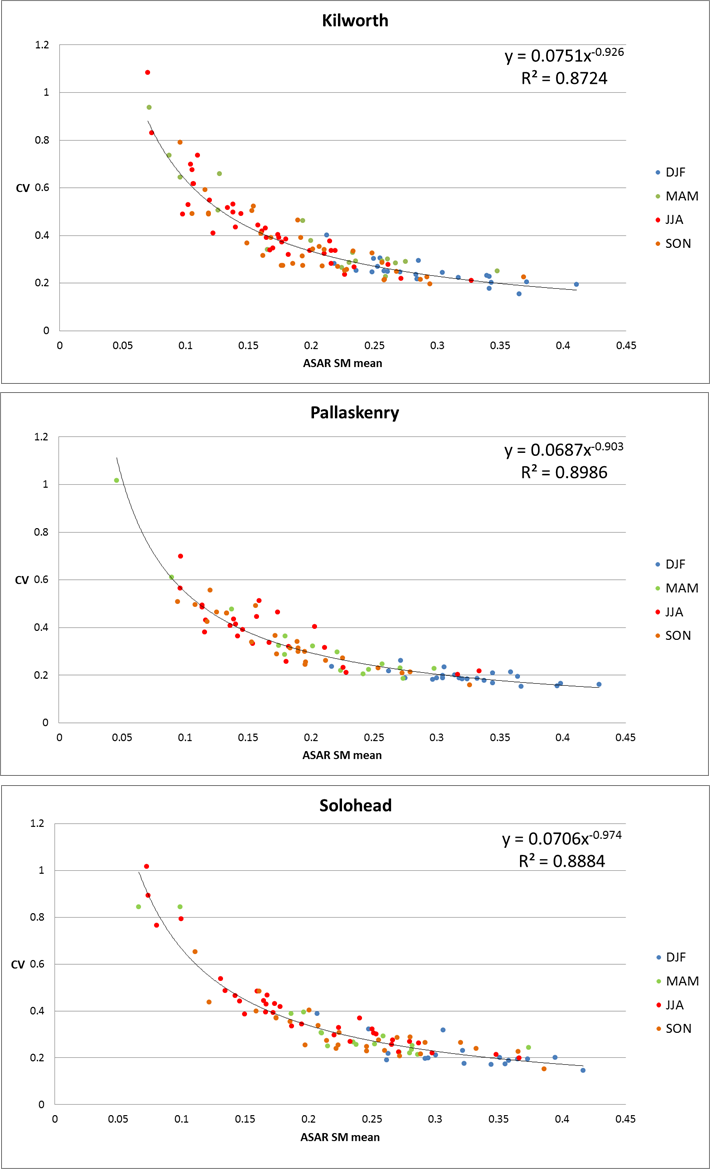


**Figure S12.** Coefficient of variation of the ASAR SM mean, evaluated for each ASAR acquisition over the ECV-sized pixels in Ireland, during the observation period 2007–2009. Seasonal-based values are highlighted by different colours. (Winter: DJF; Spring: MAM; Summer: JJA; autumn: SON) [1].

Reference

1. Pratola, C.; Barrett, B.; Gruber, A.; Kiely, G.; Dwyer, E. Evaluation of a global soil moisture product from finer spatial resolution SAR data and ground measurements at Irish sites. *Remote Sens.* **2014**, *6*, 8190–8219.
